# Supplementary material for: Association of Circulating microRNAs with Coronary Artery Disease and Usefulness for Reclassification of Healthy Individuals: The REGICOR Study
Source: PubMed Central journal article supplement (PMC7290581; doi:10.3390/jcm9051402), 2020-05-09
Supplement: jcm-09-01402-s001.pdf [file jcm-09-01402-s001.pdf]

## Supplementary Materials

### Supplementary figures

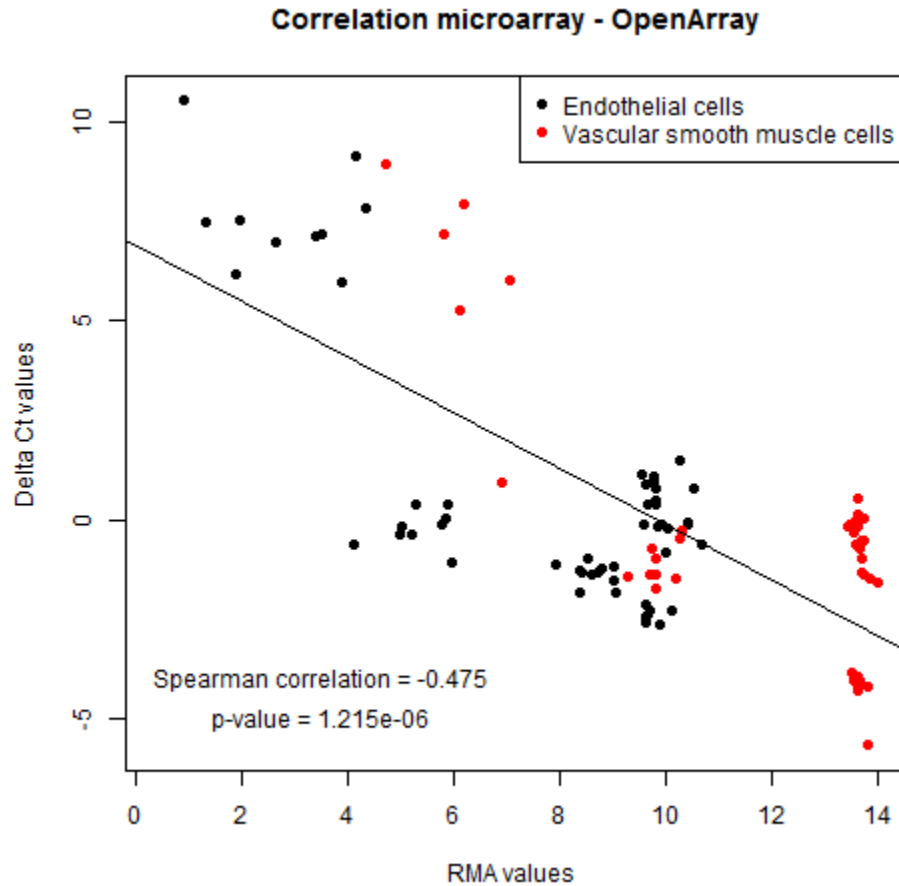

**Figure S1.** Correlation of RMA values from the microarray and delta Ct values from the Open array, obtained from miRNA expression in human endothelial and smooth muscle cells. Correlation was performed with all miRNAs measured in the custom OpenArray plates: 21 identified in the low density lipoprotein cell treatment study, 22 previously reported to be associated with coronary artery disease, 6 used as housekeeping miRNAs in previous studies, and 2 spike-ins (Table S1). RMA: robust multichip average expression measure.

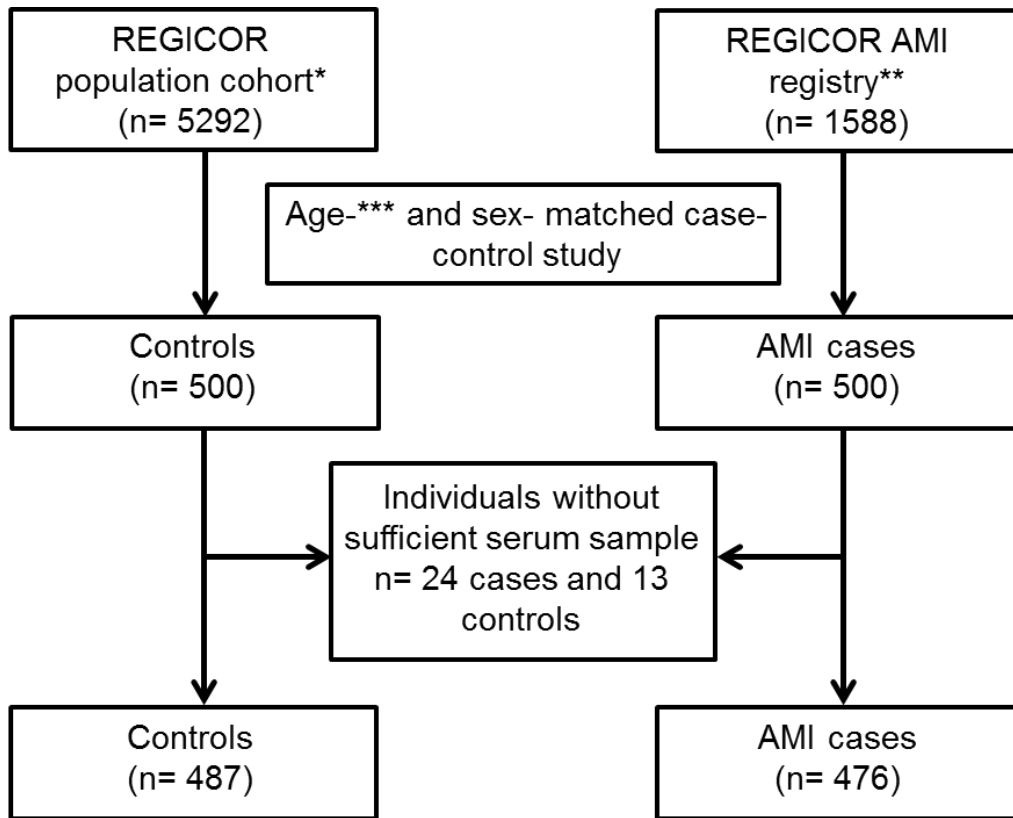

**Figure S2.** Flowchart of participants in the case-control study.\* Without prior CVD, aged between 25-74 years, and without CVD events during the follow-up. \*\* Admitted at the area reference hospital (Trueta Hospital, Girona) during 2001-2006, with all the necessary variables, and aged 25-74 years. \*\*\* Matched by age  $\pm 1$  year. AMI: acute myocardial infarction; REGICOR: Registre Gironí del Cor.

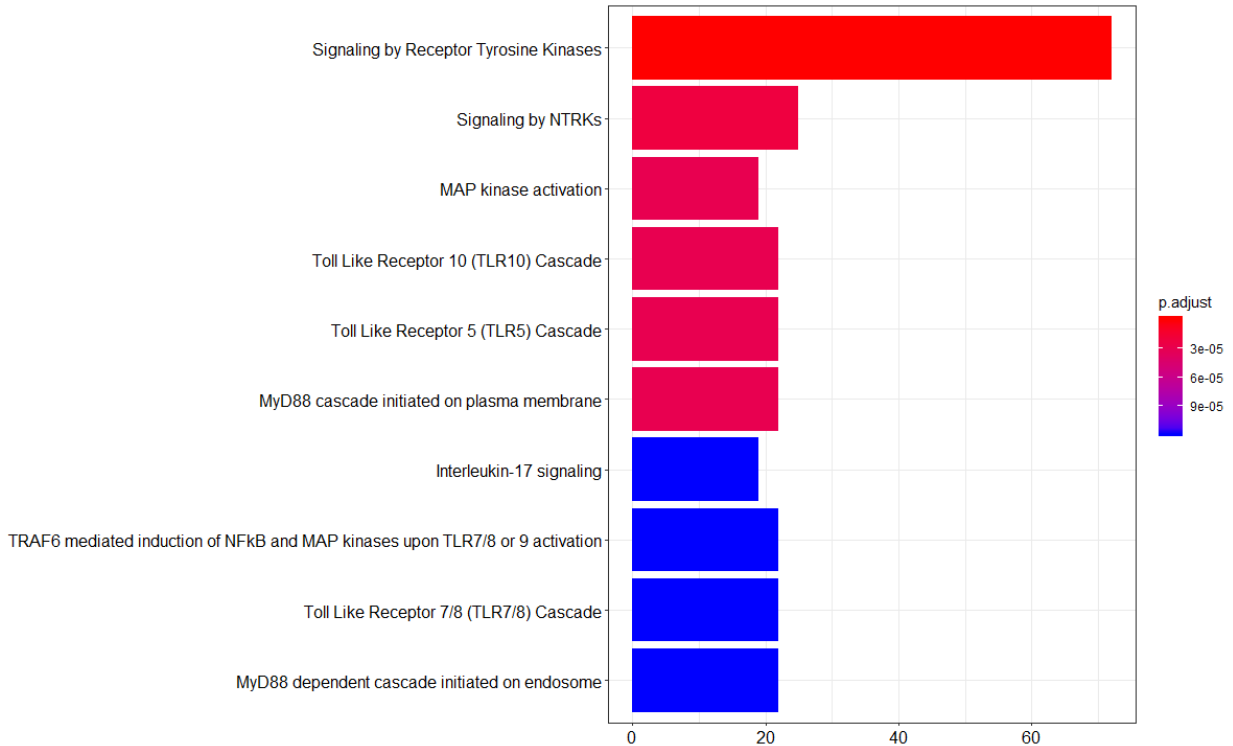

**Figure S3.** Top 10 most significant pathways associated with the miRNAs differentially expressed in the case-control study. mRNA targets of the 12 differentially expressed miRNA in the case-control study were obtained from TargetScan. Targets with high binding efficacy and conservation were selected using TargetScan scores, and used to analyze the associated pathways in Reactome with the hypergeometric test. The full list with the 53 associated pathways are shown in Supplemental Table 8.

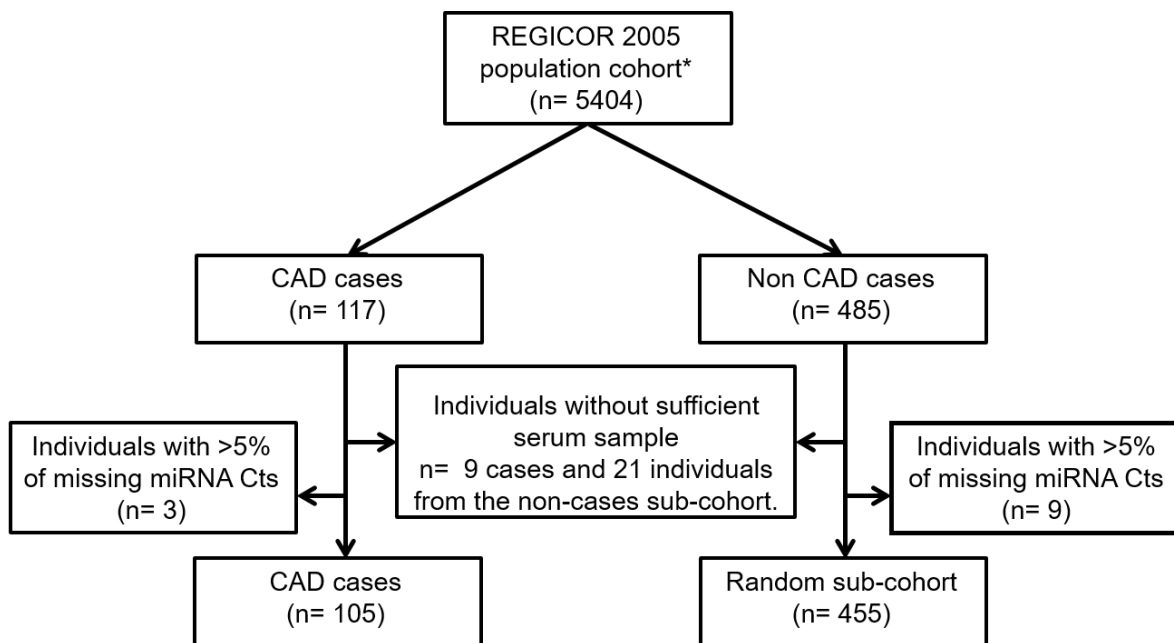

**Figure S4.** Flowchart of participants in the case-cohort study.\* Without prior CVD, aged between 25-74 years, and with available follow-up. CAD: coronary artery disease; Ct: cycle at which the real-time qPCR miRNA sample reaction exceeds the fluorescent intensity above background levels; REGICOR: Registre Gironí del Cor.

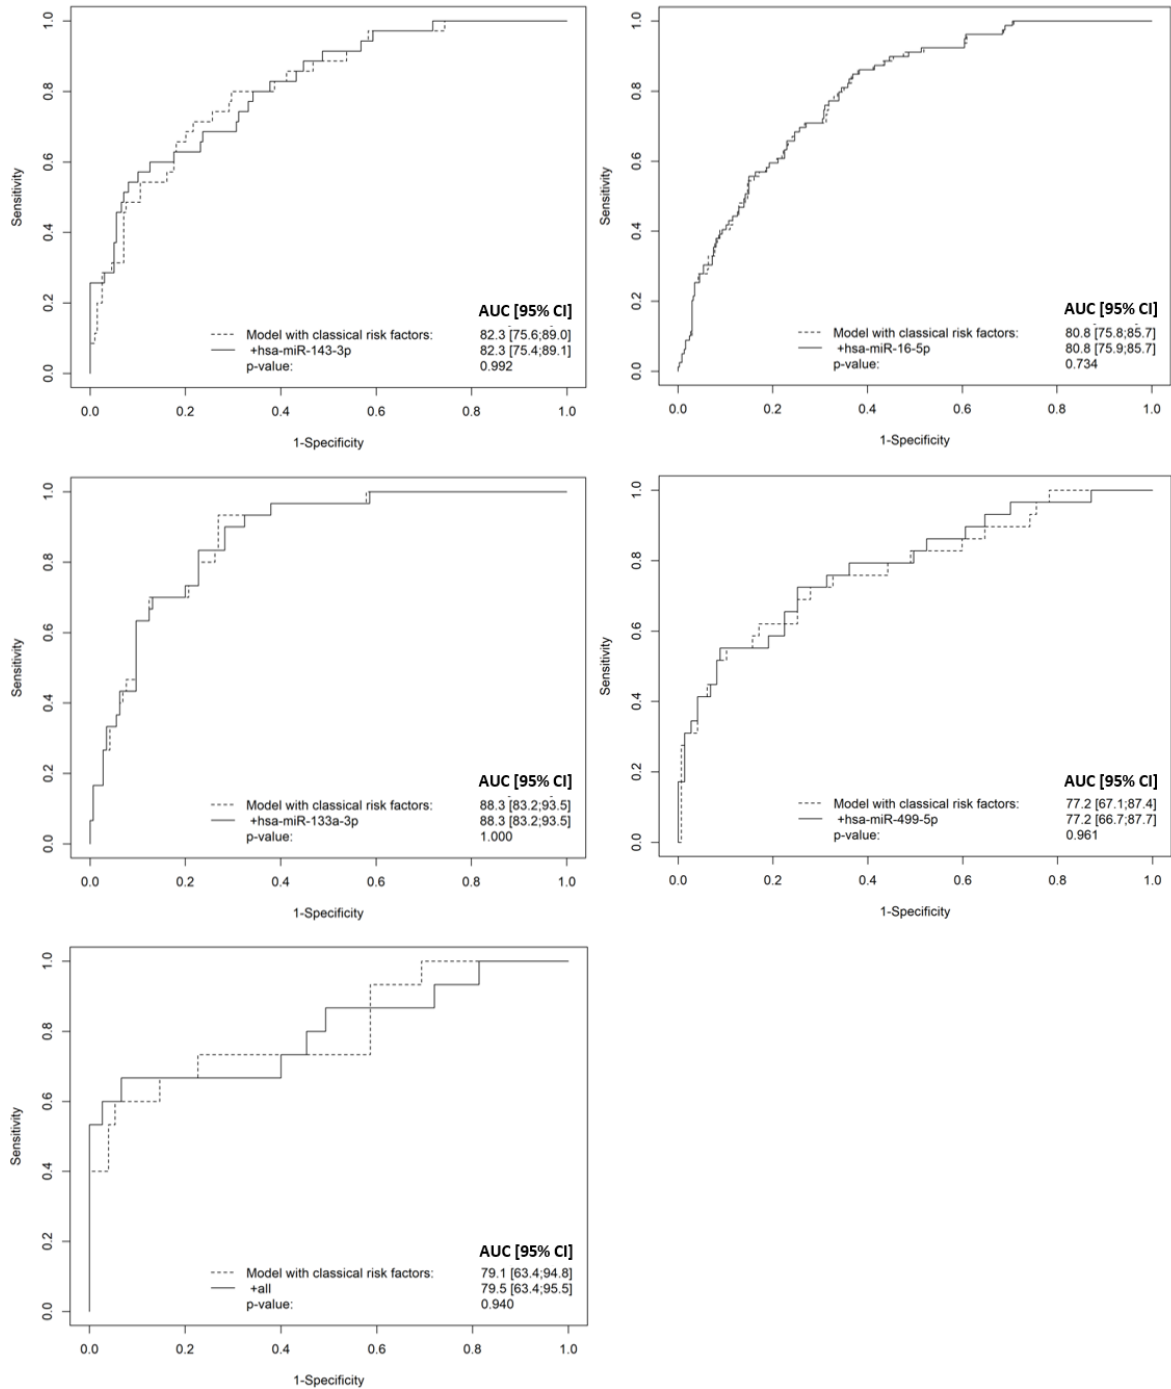

**Figure S5.** Receiver operating characteristic curves and areas under the curve for the Framingham-REGICOR CAD risk function with classical risk factors or classical risk factors plus the selected miRNAs. AUC: area under the receiver operating characteristic curve; CI: confidence interval.

## Supplementary tables

**Table S1.** List of miRNAs included in the custom OpenArray plates and analyzed in the case-control and case-cohort studies.

|                                                                                                                                            |                                         |                  |
|--------------------------------------------------------------------------------------------------------------------------------------------|-----------------------------------------|------------------|
| Identified from the LDL cell treatment study: miRNA expression following a linear or quadratic trend by increasing LDL oxidation treatment |                                         | hsa-miR-122-5p   |
|                                                                                                                                            |                                         | hsa-miR-125a-3p  |
|                                                                                                                                            |                                         | hsa-miR-138-1-3p |
|                                                                                                                                            |                                         | hsa-miR-193b*    |
|                                                                                                                                            |                                         | hsa-miR-197-3p   |
|                                                                                                                                            |                                         | hsa-miR-1229-5p  |
|                                                                                                                                            |                                         | hsa-miR-3064-3p  |
|                                                                                                                                            |                                         | hsa-miR-3151-5p  |
|                                                                                                                                            |                                         | hsa-miR-3176     |
|                                                                                                                                            |                                         | hsa-miR-3656     |
|                                                                                                                                            |                                         | hsa-miR-4632     |
|                                                                                                                                            |                                         | hsa-miR-4634     |
|                                                                                                                                            |                                         | hsa-miR-4669     |
|                                                                                                                                            |                                         | hsa-miR-4676-5p  |
|                                                                                                                                            |                                         | hsa-miR-4732-5p  |
|                                                                                                                                            |                                         | hsa-miR-6728-5p  |
|                                                                                                                                            |                                         | hsa-miR-6795-5p  |
|                                                                                                                                            | hsa-miR-6831-5p                         |                  |
|                                                                                                                                            | hsa-miR-7107-5p                         |                  |
|                                                                                                                                            | hsa-miR-8085                            |                  |
|                                                                                                                                            | hsa-miR-16-5p                           |                  |
| Used as housekeeping miRNAs in previous studies                                                                                            |                                         | hsa-miR-22-3p    |
|                                                                                                                                            |                                         | hsa-miR-24-3p    |
|                                                                                                                                            |                                         | hsa-miR-31-5p    |
|                                                                                                                                            |                                         | hsa-miR-191-5p   |
|                                                                                                                                            |                                         | hsa-miR-222-3p   |
| Identified from the literature                                                                                                             | Associated with CAD in previous studies | hsa-miR-1*       |
|                                                                                                                                            |                                         | hsa-miR-21*      |
|                                                                                                                                            |                                         | hsa-miR-125b-5p  |
|                                                                                                                                            |                                         | hsa-miR-133a*    |
|                                                                                                                                            |                                         | hsa-miR-133b     |
|                                                                                                                                            |                                         | hsa-miR-134*     |
|                                                                                                                                            |                                         | hsa-miR-143*     |
|                                                                                                                                            |                                         | hsa-miR-145*     |
|                                                                                                                                            |                                         | hsa-miR-146a*    |
| hsa-miR-186*                                                                                                                               |                                         |                  |
|                                                                                                                                            | hsa-miR-208b*                           |                  |

|           |                              |
|-----------|------------------------------|
|           | hsa-miR-499*                 |
| Spike-ins | ath-miR-159a<br>cel-miR-2-3p |

\*miRNAs for which both the 3p and the 5p were analyzed.

**Table S2.** Articles reviewed to define athero-protective and athero-prone gene sets in ECs and VSMCs.

| Main authors                                                  | Reference                                                                     |
|---------------------------------------------------------------|-------------------------------------------------------------------------------|
| <b>Endothelial cells</b>                                      |                                                                               |
| Gimbrone M.A. Jr, García-Cardeña G.                           | <i>Circ Res.</i> <b>2016</b> , <i>118</i> , 620-636.                          |
| Dai G., Kaazempur-Mofrad M.R., Natarajan S., Zhang Y., et al. | <i>Proc Natl Acad Sci U S A.</i> <b>2004</b> , <i>101</i> , 14871-14876       |
| Basatemur G.L., Jørgensen H.F., Clarke M.C.H., et al.         | <i>Nat Rev Cardiol.</i> <b>2019</b> , <i>16</i> , 727-744.                    |
| <b>Vascular smooth muscle cells</b>                           |                                                                               |
| Basatemur G.L., Jørgensen H.F., Clarke M.C.H., et al.         | <i>Nat Rev Cardiol.</i> <b>2019</b> , <i>16</i> , 727-744.                    |
| Chettimada S., Joshi S.R., Dhagia V., et al.                  | <i>Am J Physiol Heart Circ Physiol.</i> <b>2016</b> , <i>311</i> , H904-H912. |
| Beamish J.A., He P., Kottke-Marchant K., et al.               | <i>Tissue Eng Part B Rev.</i> <b>2010</b> , <i>16</i> , 467-491.              |
| Chang S., Song S., Lee J., et al.                             | <i>PLoS One.</i> <b>2014</b> , <i>9</i> , e88089.                             |
| Wanjare M., Kuo F., Gerecht S.                                | <i>Cardiovasc Res.</i> <b>2013</b> , <i>97</i> , 321-330.                     |
| Xu F., Ahmed A.S., Kang X., et al.                            | <i>Arterioscler Thromb Vasc Biol.</i> <b>2015</b> , <i>35</i> , 2145-2152.    |
| Wang X., Hu G., Gao X., et al.                                | <i>Arterioscler Thromb Vasc Biol.</i> <b>2012</b> , <i>32</i> , 2662-2669.    |
| Cattaruzza M., Nogoy N., Wojtowicz A., et al.                 | <i>FASEB J.</i> <b>2012</b> , <i>26</i> , 4864-4875.                          |

**Table S3.** Characteristics of the individuals whose samples were used in the low density lipoprotein cell treatment study.

| <b>Individuals from the COLMAH Collection</b> |             |
|-----------------------------------------------|-------------|
| <b>n=3</b>                                    |             |
| Age (years)                                   | 73.7 ± 8.1  |
| Gender (% female)                             | 1 (33%)     |
| Smoking (%)                                   | 2 (66%)     |
| Total cholesterol (mmol/L)                    | 5.69 ± 0.45 |
| Triglycerides (mmol/L)                        | 1.84 ± 0.13 |
| Systolic blood pressure (mm Hg)               | 157 ± 5.8   |
| Diastolic blood pressure (mm Hg)              | 103 ± 11.6  |
| Glucose (mmol/L)                              | 7.83 ± 2.43 |
| Creatinine (mmol/L)                           | 0.09 ± 0.06 |

Data are shown as mean ± standard deviation except for gender and smoking, for which the number of individuals and the percentage is presented.

**Table S4.** Characteristics of the case-control study participants included in the analysis.

|                                      | <b>Controls</b><br>N=487 | <b>AMI cases</b><br>N=476 | <b>p-value</b> |
|--------------------------------------|--------------------------|---------------------------|----------------|
| Age (years)                          | 60.1 ± 9.99              | 60.5 ± 9.86               | 0.567          |
| Gender (% female)                    | 387 (76%)                | 376 (79%)                 | 0.919          |
| Smoking (%)                          | 123 (26%)                | 264 (56%)                 | <0.001         |
| Previous history dyslipidemia (%)    | 169 (35%)                | 250 (59%)                 | <0.001         |
| Previous history hypertension (%)    | 190 (40%)                | 285 (64%)                 | <0.001         |
| Previous history diabetes (%)        | 70 (15%)                 | 147 (33%)                 | <0.001         |
| Body mass index (kg/m <sup>2</sup> ) | 27.6 ± 3.82              | 28.0 ± 4.28               | 0.134          |

Data are shown as number of individuals and percentage, except for age and body mass index, for which mean ± standard deviation is presented.

p-values were not adjusted for multiple comparisons.

**Table S5.** Baseline characteristics of the case-cohort study participants.

|                                         | <b>Individuals from the random<br/>cohort subsample<br/>n=455</b> | <b>Individuals that had a CAD<br/>within 10 years<br/>n=105</b> | <b>P-<br/>value</b> |
|-----------------------------------------|-------------------------------------------------------------------|-----------------------------------------------------------------|---------------------|
| Age (years)                             | 54.3 ± 11.0                                                       | 61.1 ± 9.56                                                     | <0.001              |
| Gender (% female)                       | 240 (53%)                                                         | 34 (32%)                                                        | 0.001               |
| Smoking (%)                             | 96 (21%)                                                          | 38 (37%)                                                        | 0.002               |
| Total cholesterol<br>(mmol/L)           | 5.46 ± 1.09                                                       | 5.90 ± 1.10                                                     | <0.001              |
| LDL cholesterol<br>(mmol/L)             | 3.52 ± 0.94                                                       | 3.85 ± 0.99                                                     | 0.002               |
| HDL cholesterol<br>(mmol/L)             | 1.36 ± 0.35                                                       | 1.2 ± 0.37                                                      | <0.001              |
| Triglycerides (mmol/L)                  | 1.21 ± 0.64                                                       | 1.86 ± 1.52                                                     | <0.001              |
| Systolic blood pressure<br>(mm Hg)      | 126 ± 18.9                                                        | 138 ± 19.7                                                      | <0.001              |
| Diastolic blood<br>pressure (mm Hg)     | 78.6 ± 9.8                                                        | 82.4 ± 11.0                                                     | <0.001              |
| Glucose (mmol/L)                        | 5.44 ± 1.12                                                       | 6.49 ± 2.59                                                     | <0.001              |
| Creatinine (mmol/L)                     | 0.08 ± 0.02                                                       | 0.08 ± 0.02                                                     | 0.485               |
| Body mass index<br>(kg/m <sup>2</sup> ) | 27.7 ± 5.0                                                        | 28.5 ± 4.6                                                      | 0.302               |

Data are shown as mean ± standard deviation except for gender and smoking, for which the number of individuals and the percentage are presented. p-values were not adjusted for multiple comparisons.

**Table S6.** miRNAs differentially expressed in human endothelial cells and vascular smooth muscle cells treated with oxidized low density lipoproteins (LDL) compared with native LDLs (nLDL), and following significant linear/quadratic trend across nLDL, moderately oxidized LDL (moxLDL) and highly oxidized LDL (hoxLDL) in at least one cell type.

| miRNA            | Endothelial cells |              |                   | Vascular smooth muscle cells |              |                  |
|------------------|-------------------|--------------|-------------------|------------------------------|--------------|------------------|
|                  | log2(fold change) | Fold change  | p-value           | log2(fold change)            | Fold change  | p-value          |
| hsa-miR-122-5p   | NA                | NA           | NA                | 1.380 (1)                    | <b>2.603</b> | <b>&lt;0.001</b> |
| hsa-miR-125a-3p  | -1.081 (2)        | <b>0.473</b> | <b>0.031</b>      | 0.083 (1)                    | 1.060        | 0.762            |
| hsa-miR-138-1-3p | NA                | NA           | NA                | -0.745 (1)                   | <b>0.597</b> | <b>0.007</b>     |
| hsa-miR-193b-3p  | -0.781 (2)        | <b>0.582</b> | <b>0.017</b>      | -0.112 (2)                   | 0.925        | 0.507            |
| hsa-miR-193b-5p  | -0.872 (2)        | <b>0.546</b> | <b>0.004</b>      | 0.100 (1)                    | 1.072        | 0.589            |
| hsa-miR-197-3p   | -1.975 (2)        | <b>0.254</b> | <b>0.001</b>      | -0.104 (1)                   | 0.930        | 0.567            |
| hsa-miR-1229-5p  | -0.627 (1)        | <b>0.648</b> | <b>0.002</b>      | -0.425 (1)                   | 0.745        | 0.285            |
| hsa-miR-3064-3p  | -0.753 (2)        | <b>0.593</b> | <b>0.036</b>      | -0.137 (1)                   | 0.909        | 0.440            |
| hsa-miR-3151-5p  | -0.505 (2)        | <b>0.705</b> | <b>0.033</b>      | 0.593 (1)                    | <b>1.509</b> | <b>0.006*</b>    |
| hsa-miR-3176     | NA                | NA           | NA                | -0.598 (1)                   | <b>0.660</b> | <b>0.004</b>     |
| hsa-miR-3656     | -0.239 (2)        | 0.847        | 0.627             | 0.669 (1)                    | <b>1.590</b> | <b>0.006</b>     |
| hsa-miR-4632     | NA                | NA           | NA                | 0.659 (1)                    | <b>1.579</b> | <b>0.006</b>     |
| hsa-miR-4634     | -0.986 (1)        | 0.505        | 0.094             | 0.693 (1)                    | <b>1.616</b> | <b>0.005</b>     |
| hsa-miR-4669     | -0.834 (1)        | <b>0.561</b> | <b>0.037</b>      | -0.596 (1)                   | <b>0.662</b> | <b>0.012</b>     |
| hsa-miR-4676-5p  | NA                | NA           | NA                | 0.677 (1)                    | <b>1.599</b> | <b>0.002</b>     |
| hsa-miR-4732-5p  | -0.700 (2)        | <b>0.615</b> | <b>0.049</b>      | 0.232 (2)                    | 1.174        | 0.312            |
| hsa-miR-6728-5p  | -0.745 (2)        | 0.597        | 0.125             | -1.015 (1)                   | <b>0.495</b> | <b>0.002</b>     |
| hsa-miR-6795-5p  | -0.628 (2)        | <b>0.647</b> | <b>0.014</b>      | -0.240 (1)                   | 0.847        | 0.556            |
| hsa-miR-6831-5p  | -0.759 (2)        | <b>0.591</b> | <b>0.032</b>      | -0.614 (1)                   | <b>0.653</b> | <b>0.022</b>     |
| hsa-miR-7107-5p  | 0.640 (2)         | <b>1.559</b> | <b>0.020</b>      | -0.375 (1)                   | <b>0.771</b> | <b>0.046</b>     |
| hsa-miR-8085     | -0.775 (1)        | <b>0.584</b> | <b>&lt;0.001*</b> | 0.375 (1)                    | 1.296        | 0.155            |

hoxLDL vs., nLDL, (2) moxLDL vs., Nldl, \* Expression change was significant in comparisons (1) and (2), p-values were not adjusted for multiple comparisons.

**Table S7.** Adjusted p-values of linear/quadratic trend across native low density lipoproteins (nLDL), moderately oxidized LDL (moxLDL) and highly oxidized LDL (hoxLDL). The miRNAs were selected when significant or marginally significant in at least one cell type.

| miRNA          | Endothelial cells |                 | Vascular smooth muscle cells |                 |
|----------------|-------------------|-----------------|------------------------------|-----------------|
|                | Linear trend      | Quadratic trend | Linear trend                 | Quadratic trend |
| hsa-miR-122-5p | NA                | NA              | <b>0.024</b>                 | 0.430           |



|                  |              |                  |              |       |
|------------------|--------------|------------------|--------------|-------|
| hsa-miR-125a-3p  | 0.818        | 0.051            | NA           | NA    |
| hsa-miR-138-1-3p | NA           | NA               | <b>0.024</b> | 0.392 |
| hsa-miR-193b-3p  | 0.937        | <b>&lt;0.001</b> | NA           | NA    |
| hsa-miR-193b-5p  | 0.937        | 0.051            | NA           | NA    |
| hsa-miR-197-3p   | 0.987        | <b>0.047</b>     | NA           | NA    |
| hsa-miR-1229-5p  | 0.321        | <b>0.014</b>     | NA           | NA    |
| hsa-miR-3064-3p  | 0.927        | <b>0.014</b>     | NA           | NA    |
| hsa-miR-3151-5p  | NA           | NA               | 0.052        | 0.540 |
| hsa-miR-3176     | NA           | NA               | <b>0.031</b> | 0.597 |
| hsa-miR-3656     | NA           | NA               | 0.052        | 0.469 |
| hsa-miR-4632     | NA           | NA               | <b>0.024</b> | 0.956 |
| hsa-miR-4634     | NA           | NA               | 0.052        | 0.336 |
| hsa-miR-4669     | 0.372        | 0.763            | 0.052        | 0.767 |
| hsa-miR-4676-5p  | NA           | NA               | 0.024        | 0.767 |
| hsa-miR-4732-5p  | 0.617        | <b>0.007</b>     | NA           | NA    |
| hsa-miR-6728-5p  | NA           | NA               | <b>0.031</b> | 0.469 |
| hsa-miR-6795-5p  | 0.937        | 0.051            | NA           | NA    |
| hsa-miR-6831-5p  | 0.372        | 0.763            | 0.052        | 0.767 |
| hsa-miR-7107-5p  | 0.818        | 0.051            | NA           | NA    |
| hsa-miR-8085     | <b>0.046</b> | 0.172            | NA           | NA    |

Missing observations correspond to miRNAs without data for the specific cell type or that had a Fold Change <1.5., p-values were adjusted for multiple comparisons.

**Table S8.** miRNA expression in the case-control study: fold change of cases *vs.*, controls.

| miRNA           | N   | log2(fold change) | Fold change    | adjusted p-value |
|-----------------|-----|-------------------|----------------|------------------|
| hsa-miR-16-5p   | 890 | 3.426             | <b>10.745</b>  | <b>&lt;0.001</b> |
| hsa-miR-21-5p   | 751 | 2.743             | <b>6.696</b>   | <b>&lt;0.001</b> |
| hsa-miR-22-3p   | 859 | 1.114             | <b>2.164</b>   | <b>&lt;0.001</b> |
| hsa-miR-24-3p   | 947 | 0.014             | 1.010          | 0.228            |
| hsa-miR-122-5p  | 591 | 2.276             | <b>4.845</b>   | <b>&lt;0.001</b> |
| hsa-miR-125b-5p | 924 | 0.431             | <b>1.348</b>   | <b>&lt;0.001</b> |
| hsa-miR-133a-3p | 455 | 3.300             | <b>9.851</b>   | <b>&lt;0.001</b> |
| hsa-miR-143-3p  | 624 | 2.397             | <b>5.268</b>   | <b>&lt;0.001</b> |
| hsa-miR-145-5p  | 671 | 1.284             | <b>2.435</b>   | <b>&lt;0.001</b> |
| hsa-miR-146a-5p | 909 | 0.428             | <b>1.345</b>   | <b>0.006</b>     |
| hsa-miR-186-5p  | 829 | 1.678             | <b>3.200</b>   | <b>&lt;0.001</b> |
| hsa-miR-191-5p  | 871 | 0.217             | 1.162          | 0.081            |
| hsa-miR-222-3p  | 739 | 3.170             | <b>8.999</b>   | <b>&lt;0.001</b> |
| hsa-miR-499a-5p | 595 | 6.885             | <b>118.186</b> | <b>&lt;0.001</b> |

p-values were adjusted for multiple comparisons.

**Table S9.** Pathways associated with the targets with higher binding efficacy and conservation for the miRNA associated to myocardial infarction discovered in the case-control study.

| Pathway                                | Number of targets* | Adjusted p-value |
|----------------------------------------|--------------------|------------------|
| Signaling by Receptor Tyrosine Kinases | 72                 | <0.001           |

|                                                                                 |    |        |
|---------------------------------------------------------------------------------|----|--------|
| Signaling by NTRKs                                                              | 25 | <0.001 |
| MAP kinase activation                                                           | 19 | <0.001 |
| Toll Like Receptor 10 (TLR10) Cascade                                           | 22 | <0.001 |
| Toll Like Receptor 5 (TLR5) Cascade                                             | 22 | <0.001 |
| MyD88 cascade initiated on plasma membrane                                      | 22 | <0.001 |
| Interleukin-17 signaling                                                        | 19 | <0.001 |
| TRAF6 mediated induction of NFkB and MAP kinases upon<br>TLR7/8 or 9 activation | 22 | <0.001 |
| Toll Like Receptor 7/8 (TLR7/8) Cascade                                         | 22 | <0.001 |
| MyD88 dependent cascade initiated on endosome                                   | 22 | <0.001 |
| MyD88:MAL(TIRAP) cascade initiated on plasma membrane                           | 22 | <0.001 |
| Toll Like Receptor TLR6:TLR2 Cascade                                            | 22 | <0.001 |
| Toll Like Receptor 9 (TLR9) Cascade                                             | 22 | <0.001 |
| Toll Like Receptor TLR1:TLR2 Cascade                                            | 22 | <0.001 |
| Toll Like Receptor 2 (TLR2) Cascade                                             | 22 | <0.001 |
| Signaling by NTRK1 (TRKA)                                                       | 19 | <0.001 |
| Activation of BH3-only proteins                                                 | 11 | <0.001 |
| Negative regulation of the PI3K/AKT network                                     | 22 | <0.001 |
| Toll Like Receptor 3 (TLR3) Cascade                                             | 21 | <0.001 |
| Signaling by FGFR1                                                              | 14 | <0.001 |
| MyD88-independent TLR4 cascade                                                  | 21 | <0.001 |
| TRIF(TICAM1)-mediated TLR4 signaling                                            | 21 | <0.001 |
| Intrinsic Pathway for Apoptosis                                                 | 13 | <0.001 |
| L1CAM interactions                                                              | 23 | <0.001 |
| Transcriptional Regulation by TP53                                              | 50 | <0.001 |
| Diseases of signal transduction                                                 | 51 | <0.001 |
| Negative regulation of FGFR2 signaling                                          | 11 | <0.001 |
| Signaling by FGFR3                                                              | 12 | <0.001 |
| Negative regulation of FGFR3 signaling                                          | 10 | <0.001 |
| Toll Like Receptor 4 (TLR4) Cascade                                             | 24 | <0.001 |
| MAPK family signaling cascades                                                  | 42 | <0.001 |
| Neurotoxicity of clostridium toxins                                             | 6  | <0.001 |
| PI5P, PP2A and IER3 Regulate PI3K/AKT Signaling                                 | 20 | 0.001  |
| MAPK targets/ Nuclear events mediated by MAP kinases                            | 10 | 0.002  |
| MAPK1/MAPK3 signaling                                                           | 37 | 0.002  |
| RAF/MAP kinase cascade                                                          | 36 | 0.002  |
| Negative regulation of FGFR1 signaling                                          | 10 | 0.003  |
| Negative regulation of MAPK pathway                                             | 11 | 0.003  |
| ERK/MAPK targets                                                                | 8  | 0.003  |
| Signaling by FGFR4                                                              | 11 | 0.004  |
| Signaling by Interleukins                                                       | 56 | 0.005  |
| Chk1/Chk2(Cds1) mediated inactivation of Cyclin B:Cdk1<br>complex               | 6  | 0.005  |
| Clathrin-mediated endocytosis                                                   | 23 | 0.007  |
| Negative regulation of FGFR4 signaling                                          | 9  | 0.008  |
| Nuclear Events (kinase and transcription factor activation)                     | 8  | 0.008  |
| Recycling pathway of L1                                                         | 11 | 0.009  |

|                                                     |    |       |
|-----------------------------------------------------|----|-------|
| Other interleukin signaling                         | 8  | 0.010 |
| PIP3 activates AKT signaling                        | 35 | 0.010 |
| Toll-like Receptor Cascades                         | 24 | 0.011 |
| Activation of BAD and translocation to mitochondria | 6  | 0.011 |
| Insulin receptor signalling cascade                 | 12 | 0.011 |
| Signaling by PTK6                                   | 12 | 0.011 |
| Signaling by Non-Receptor Tyrosine Kinases          | 12 | 0.011 |

Number of targets present in each pathway from the list of targets with higher binding efficacy and conservation (n=1431). p-values were adjusted for multiple comparisons.

**Table S10.** miRNA expression effect (hazard ratio and 95% confidence interval (CI)) adjusted for age and sex in the case-cohort study.

| miRNA           | N   | Hazard ratio | 95% CI                |
|-----------------|-----|--------------|-----------------------|
| hsa-miR-16-5p   | 475 | 1.026        | [0.928, 1.134]        |
| hsa-miR-21-5p   | 352 | 0.896        | [0.675, 1.189]        |
| hsa-miR-22-3p   | 423 | 1.049        | [0.796, 1.382]        |
| hsa-miR-24-3p   | 544 | 1.083        | [0.842, 1.417]        |
| hsa-miR-122-5p  | 245 | 1.081        | [0.846, 1.381]        |
| hsa-miR-125b-5p | 532 | 1.004        | [0.828, 1.223]        |
| hsa-miR-133a-3p | 184 | 0.952        | [0.743, 1.221]        |
| hsa-miR-143-3p  | 248 | <b>0.562</b> | <b>[0.384, 0.824]</b> |
| hsa-miR-145-5p  | 312 | 0.920        | [0.681, 1.243]        |
| hsa-miR-146a-5p | 482 | 1.193        | [0.922, 1.545]        |
| hsa-miR-186-5p  | 424 | 0.942        | [0.792, 1.120]        |
| hsa-miR-191-5p  | 448 | 0.971        | [0.756, 1.235]        |
| hsa-miR-222-3p  | 333 | 1.075        | [0.854, 1.354]        |
| hsa-miR-499a-5p | 189 | 0.934        | [0.750, 1.164]        |

**Table S11.** Athero-protective and athero-prone hsa-miR-143-3p targets identified in ECs and SMCs.

| <b>MAPK7: Mitogen-Activated Protein Kinase 7</b> |                                                            |
|--------------------------------------------------|------------------------------------------------------------|
| <b>PODXL: Podocalyxin Like</b>                   |                                                            |
| <b>EC athero-protective targets</b>              | <b>PPAP2B: Phospholipid phosphatase 3</b>                  |
|                                                  | <b>SENP2: SUMO Specific Peptidase 2</b>                    |
|                                                  | CTGF: <i>connective tissue growth factor</i>               |
|                                                  | SERPINE1: Serpin Family E Member 1                         |
| EC athero-prone targets                          | VTI1B: Vesicle Transport Through Interaction With T-SNAREs |
|                                                  | THBS1: Thrombospondin 1                                    |
|                                                  | NRG1: Neuregulin 1                                         |
| VSMC athero-protective targets                   | CACNA1C: Calcium Voltage-Gated Channel Subunit Alpha1 C    |
|                                                  | COL1A1: Collagen Type I Alpha 1 Chain                      |
| VSMC athero-prone targets                        | PTGS2: Prostaglandin-Endoperoxide Synthase 2               |
